# Supplementary figures and images for: ProDiGe: Prioritization Of Disease Genes with multitask machine learning from positive and unlabeled examples
Source: Springer Nature journal article supplement (doi:10.1186/1471-2105-12-389), 2011-10-06

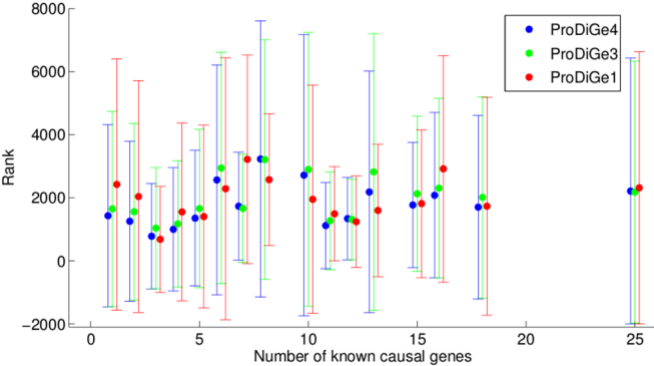

Supplement: 12859_2011_4875_MOESM7_ESM.pdf [file 12859_2011_4875_MOESM7_ESM.pdf]
